# Supplementary material
Source: ML conference proceedings conference paper supplement (https://openreview.net/forum?id=X2yzXtH4wp)

**(a)**

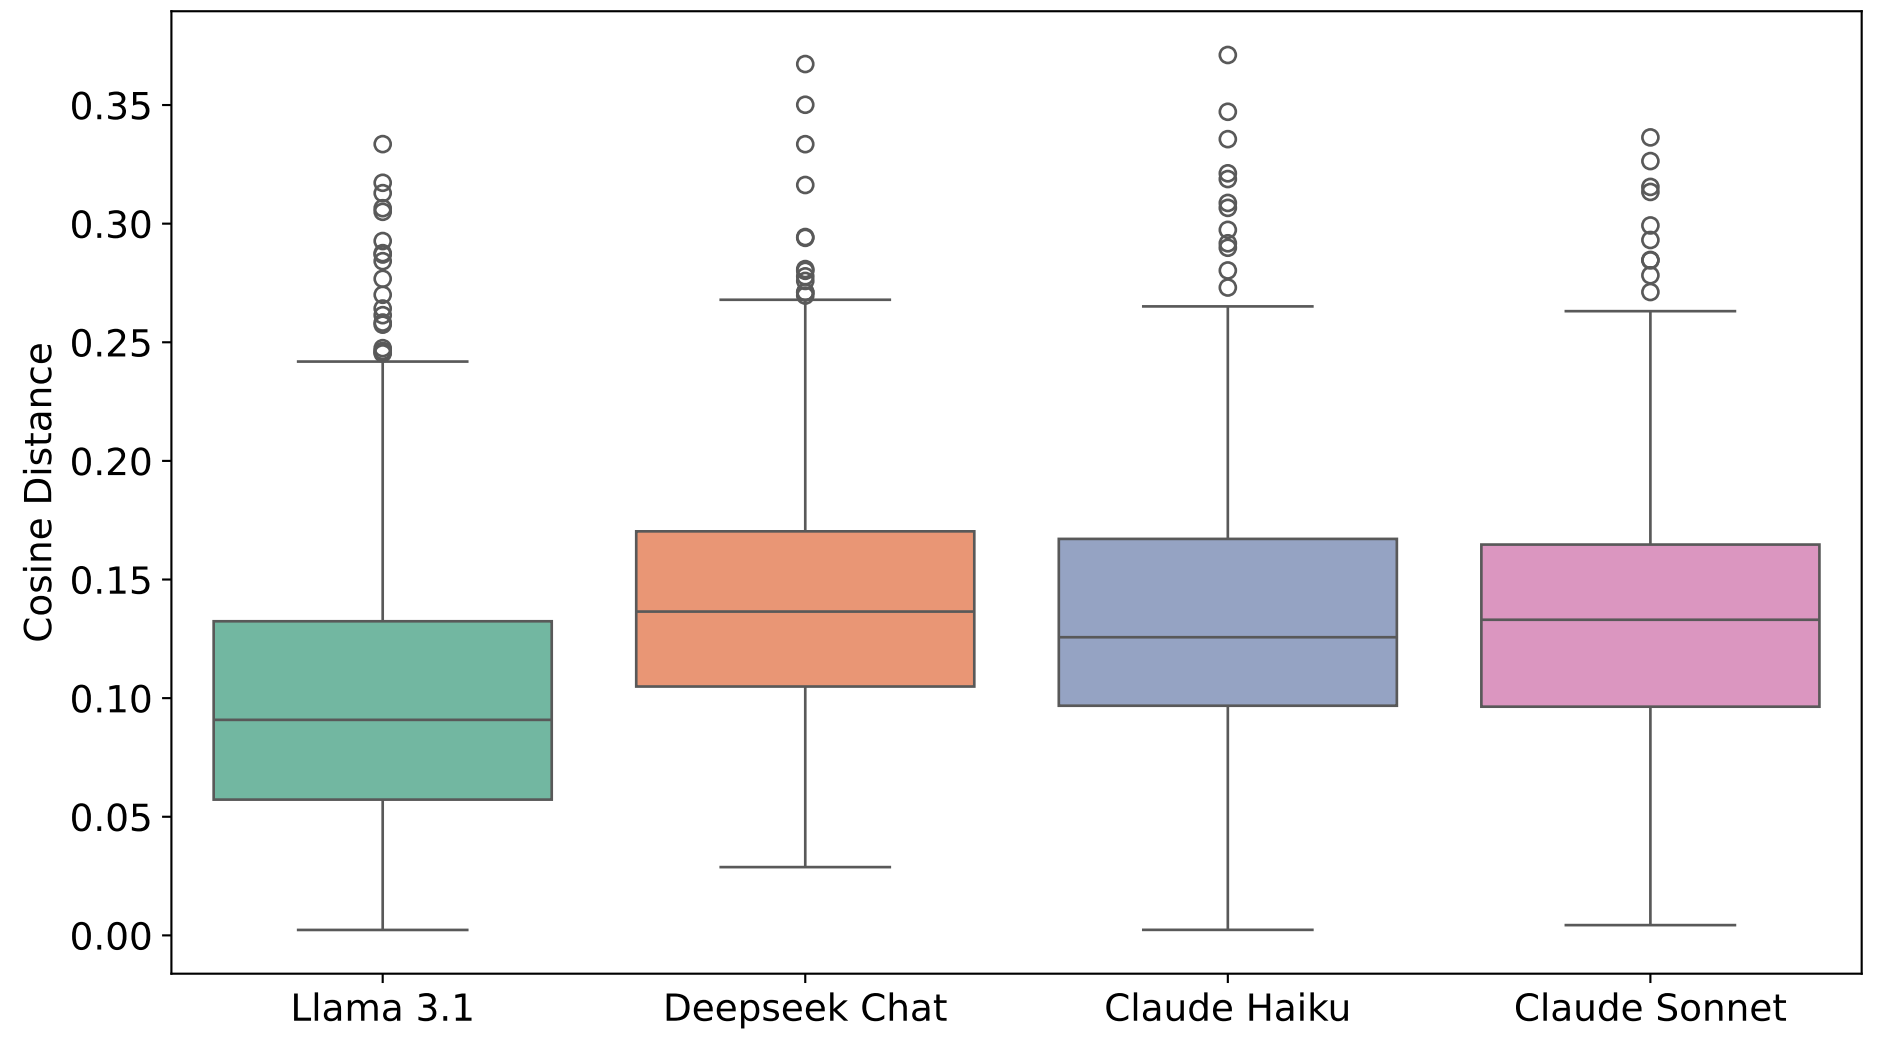

**(b)**

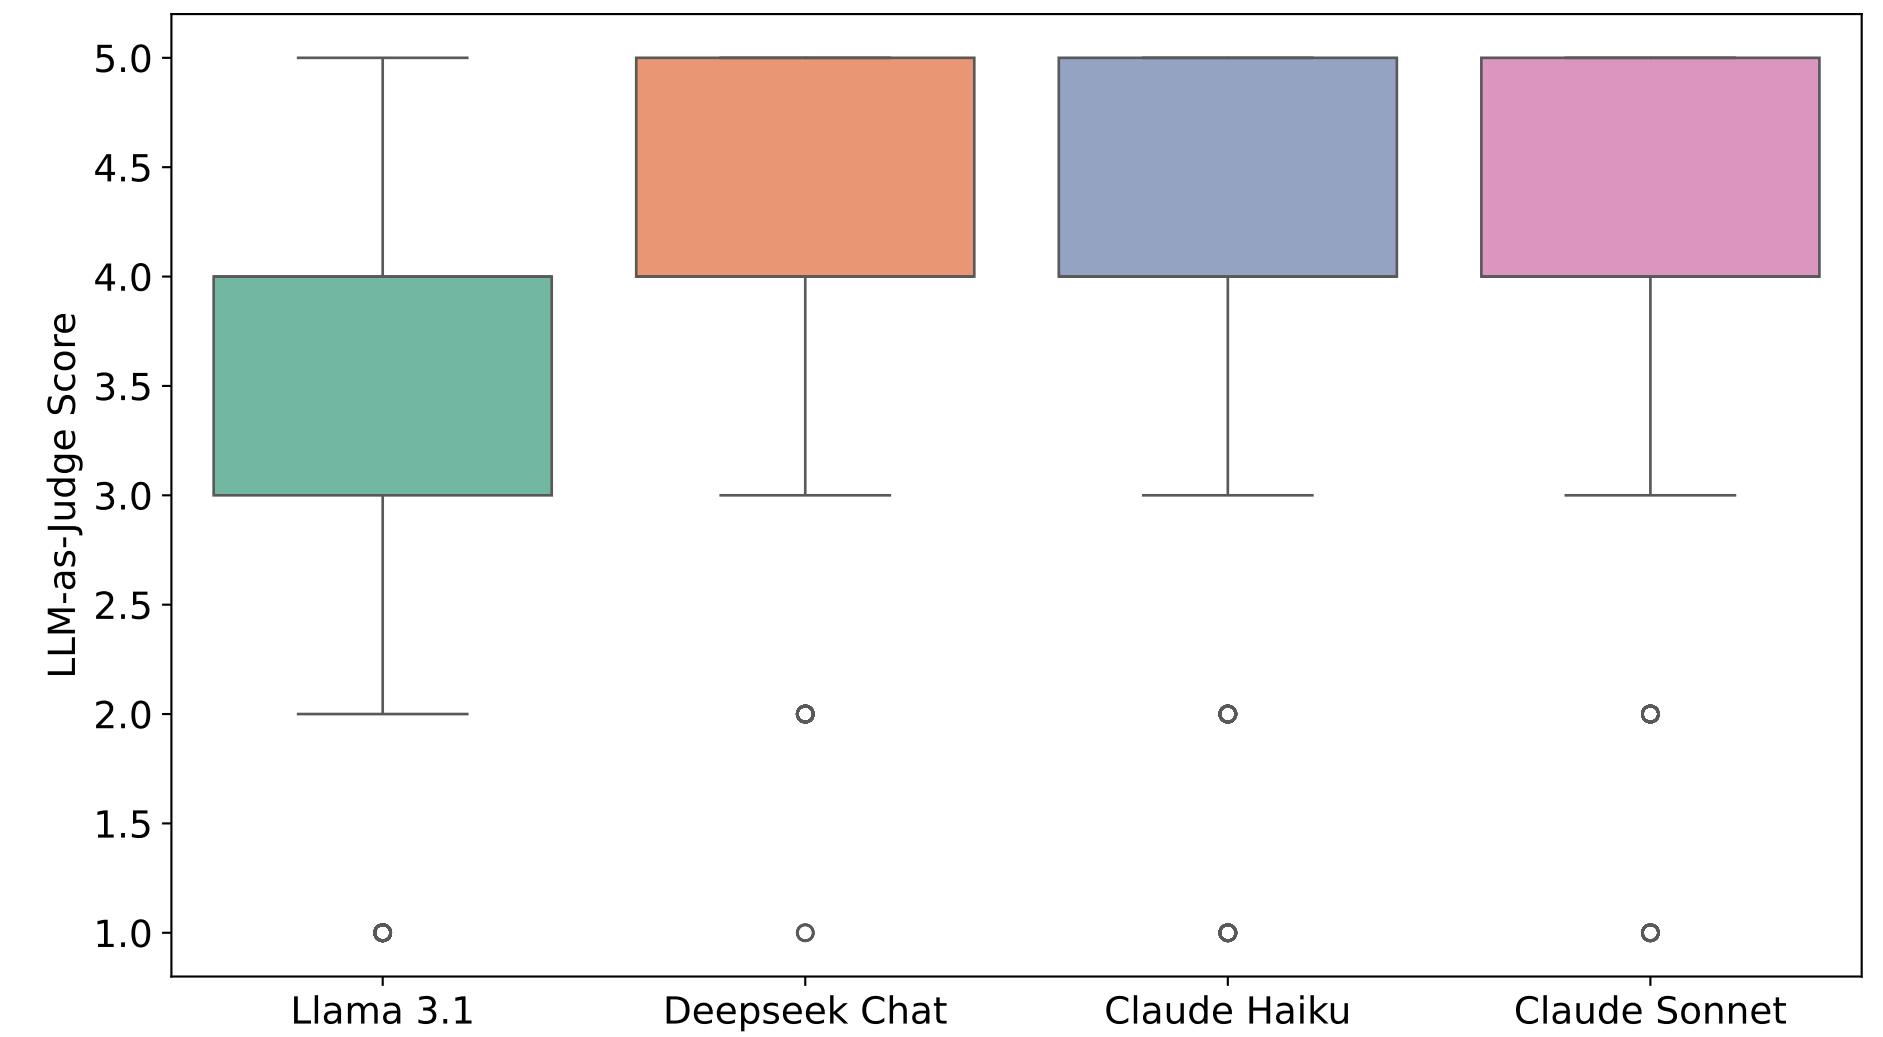

Supplement: supplementary_material [file question_quality_box_plot.pdf › InteractiveSWEAgents 2/experiments/figures/question_quality_box_plot.pdf]
